# Supplementary material
Source: PubMed Central journal article supplement (PMC3497740)
Supplement: 1212303109_pnas.201212303SI.pdf [file 1212303109_pnas.201212303SI.pdf]

# Supporting information

Decelle et al. 10.1073/pnas.1212303109

## SI Materials and Methods

**Collection and DNA Extraction of Symbiotic Acantharia and Cultured *Phaeocystis* Strains.** Symbiotic Acantharia were collected in 2010 and 2011 at different locations worldwide (Table S1). Acantharian cells were harvested at the subsurface by slowly towing nets (64- and 200- $\mu\text{m}$  mesh size) and either directly isolated or preserved within the bulk sample in 70% ethanol. Micropipette isolation of cells using an inverted microscope was conducted, and each single cell sorted was individually cleaned three times in successive 0.2- $\mu\text{m}$  filtered seawater baths. Freshly isolated and cleaned cells were then maintained for several hours in 0.2  $\mu\text{m}$  filtered seawater to allow self-cleaning. Both fresh and ethanol-preserved cells were photographed under an inverted microscope and finally isolated into a guanidine-containing extraction buffer (GITC). Eppendorf tubes containing the samples were stored at  $-20^\circ\text{C}$  until processing. The single-cell DNA extraction of the Acantharia-symbiont holobiont was carried out as described previously (1). Detailed information on each isolated specimen, such as the picture and collection data, are available at <http://abims.sb-roscoff.fr/renkan>.

In parallel, 23 strains of *Phaeocystis* sp., isolated in different oceans worldwide, were obtained from various culture collections. Codes for strain sources are as follows: RCC, Roscoff Culture Collection, France; NIES, National Institute for Environmental Studies, Japan; PCC, Plymouth Culture Collection, United Kingdom; and K, Scandinavian Culture Collection of Algae and Protozoa, Copenhagen, Denmark. Cultured cells were harvested in exponential growth phase and concentrated by centrifugation. Total nucleic acids were extracted using the the Nucleospin RNA II kit (Macherey-Nagel) and quantified using a Nanodrop ND-1000 Spectrophotometer (Labtech International).

**Gene Amplification and Phylogenetic Methods for the Host Acantharia.** Polymerase chain reactions (PCR) on Acantharia were performed with Radiolaria-specific primers to amplify the partial *18S* and *28S* (D1/D2 domains) rDNA genes (see ref. 1 for details). Additional sequences of symbiotic Acantharia were acquired from GenBank and added to the sequences obtained in this study. This dataset was then aligned with MAFFT v6.818 (2) and concatenated in one partition (94 taxa with 2.4 kb aligned characters), and phylogenetic relationships were reconstructed with RAxML (3), using the GTR + G model. The phylogenetic tree of Acantharia was used for the cophylogenetic analyses (see below). Sequences obtained from the host Acantharia were deposited in GenBank under accession nos. JQ697697–JQ697738.

**Gene Amplification and Phylogenetic Methods for *Phaeocystis* in Symbiosis and in Culture.** PCRs on symbiotic and cultured *Phaeocystis* were conducted to amplify the *18S* and *28S* rDNA and the plastidial *rbcl* and *psbA* genes (see refs. 4–11 for detailed information on primers). Amplifications were performed with the Phusion high-fidelity DNA polymerase (Finnzymes) in a 25- $\mu\text{L}$  reaction volume, using the following PCR parameters: 30 s at  $98^\circ\text{C}$ ; followed by 35 cycles of 10 s denaturation at  $98^\circ\text{C}$ , 30 s annealing at  $50^\circ\text{C}$  for the *18S*, *28S*, and *psbA* genes and at  $55^\circ\text{C}$  for *rbcl* gene, and 30 s extension at  $72^\circ\text{C}$ ; with a final elongation step of 10 min at  $72^\circ\text{C}$ . PCR products were then purified by EXOSAP-IT (GE Healthcare Bio-Sciences) and bidirectionally sequenced using the ABI-PRISM Big Dye Terminator Cycle Sequencing Kit (Applied Biosystems). Raw sequences were edited and assembled with Chromas Pro v.1.5 (Gene Codes). Sequences obtained from *Phaeocystis* in symbiosis

and in culture were deposited in GenBank under accession nos. JX660702–JX660995.

Single-locus analyses were performed for each genetic marker. Sequences of acantharian symbionts and *Phaeocystis* strains obtained in this study were added to GenBank sequences from other *Phaeocystis* strains and related environmental clone libraries. The four datasets were thus aligned with MAFFT v6.818. The default alignment algorithm was used for sequences coding for the plastidial *rbcl* and *psbA* genes, whereas for rDNA sequences the Q-INS-i alignment option taking into account the secondary structure was selected. Ambiguous regions of the *18S* and the *28S* rDNA alignment, characterized by a high rate of insertion/deletion, were removed before analyses, using the software Gblocks v.0.91b (12). A list of taxa included in these single-locus datasets is provided upon request. For phylogenetic analyses, each dataset contained five outgroup sequences from the Prymnesiophyceae (*Emiliania huxleyi*, *Isochrysis galbana*, *Pleurochrysis carterae*, *Prymnesium parvum*, and *Imantonia rotunda*). For each dataset, the optimal model of evolution was determined under the AIC, AICc, and BIC criteria implemented in jModelTest (13). Maximum-likelihood (ML) analyses and statistical support were assessed by performing 1,000 bootstrap replicates as implemented on the RAxML version 7.2.0 blackbox servers. Resulting single-gene phylogenies are shown in Figs. S1–S3.

After visual checking of the congruence of each single-locus phylogeny, a concatenated dataset was constructed. This dataset constituted 3,170 bp obtained by concatenation of the sequences of the ribosomal loci *18S* (686 pb) and *28S* (827 pb) and the plastidial *psbA* (564 pb) and *rbcl* (1093 pb) genes for 131 taxa: 98 symbionts, 28 *Phaeocystis* culture strains, and 5 Haptophyta taxa as the outgroup. Accession numbers of the sequences and details of the dataset are available upon request. All analyses on the concatenated four-locus alignment were carried out with a model in which the dataset was partitioned by marker, thus defining four partitions. Maximum-likelihood phylogenies were inferred using RAxML with GTR+I+ $\Gamma$  model parameters estimated independently for each partition by jModelTest. Analyses were performed for each dataset at least four times, with different starting trees. Statistical support was assessed by performing 2,000 bootstrap replicates.

The Bayesian inference was conducted on the concatenated datasets (in one partition), using Beast v.1.6.1 and companion software (14) under the GTR+I+ $\Gamma$  (4) model. Two Markov chain Monte Carlo (MCMC) chains were run for 50 million generations, sampling every 1,000 generations. The two runs were combined with LogCombiner v1.6.1, and convergence of log-likelihoods and parameter values were assessed in Tracer v1.4.1. Ten percent of the total trees were discarded as burn-in, and the remaining trees were used by TreeAnnotator 1.5.4 to build the consensus tree and to calculate the posterior probabilities (PP) of each node. The final tree was visualized with FigTree v1.3.1. The multigene phylogeny is presented Fig. S4.

**Mantel Test.** Mantel tests were performed to assess whether the distributions of the host (Acantharia) and the symbiont (*Phaeocystis*) are driven by a biogeographical pattern. A geographical distance matrix based on coordinates and a pairwise genetic distance matrix were built for each genetic marker of each partner, using Geographic Distance Matrix Generator v.1.2.3 (15) and MEGA5 (16), respectively. A Pearson's correlation between the matrices was then tested using the R package ape, on the basis of 999 permutations. Correlations were significant ( $P$  value = 0.001) only for the genetic markers of the symbiont *Phaeocystis*: 0.406,

0.425, 0.858, and 0.652 for the 18S rDNA, the 28S rDNA, psbA gene, and rbcL gene, respectively. No significant correlations were found for both the 18S rDNA and the 28S rDNA of the host Acantharia ( $P > 0.29$ ).

**Cophylogenetic Analyses.** Several methods have been published to study cophylogenetic patterns between hosts and their symbionts (17, 18), which can be classified into event-based methods and global-fit methods (19). Event-based methods generally aim at reconciling tree topologies of hosts and symbionts by adequately mixing four or five kinds of coevolutionary events (cospeciation or codivergence, host switch, duplication, sorting, and failure to diverge—not used in all methods) and find the best reconstructions by minimizing their global cost (each event type is attributed a cost) to produce optimal cophylogenetic scenarios. The significance of the global cost is assessed against a random distribution of costs generated using random trees: If the observed optimal cost is significantly lower than optimal costs computed from randomly generated trees, then a global cospeciation signal is present. Global-fit methods do not rely on events but assess the congruence between the two trees, taking the pattern of host specificity into account; again the observed level of congruence is tested against a random distribution. No scenario is produced but the computational burden is much lighter than for event-based methods. The phylogenetic trees of 94 host taxa (Acantharia) and 94 symbiont taxa (each symbiont is associated with one host), inferred as explained above, have been used in these cophylogenetic analyses. We used an event-based method, Jane 3 (20), and a global-fit method, ParaFit (21), implemented in CopyCat (22). Jane was used with the following event–cost scheme: cospeciation = 0, duplication = 1, host switch = 2, sorting = 1, failure = 1; a number of generations of 500; and a population size of 50. Statistical tests for tree congruence in ParaFit and Jane were carried out with 999 permutations, and symbiont trees instead of tip mappings were randomized in Jane. Results of these different cophylogenetic analyses are shown in Figs. S5 and S6.

**Molecular Clock Analyses.** Divergence times of Acantharia and *Phaeocystis* were estimated using Bayesian relaxed-clock methods implemented in BEAST v.1.6.1. For host Acantharia, 18S rDNA sequences of several representatives from each acantharian clade were retrieved from GenBank: clades B, C, D, E, and F and Acanth I, II, and III. Because Acantharia do not have a fossil record, we used an indirect calibration with five fossil-based calibration points from other fossilizable Radiolaria: Spumellaria and Nassellaria (a list of used taxa with their GenBank accession numbers is available upon request). The 18S rDNA sequences of these radiolarian groups, publicly available, were therefore added to the acantharian sequences to build a dataset of 98 taxa with 525 unambiguously aligned positions, using Gblocks v.0.91b. The monophyly of the Acantharia (ingroup) was set in BEAST. Different models were analyzed by alternatively adding or removing calibrations. The cross-comparison between these different models allowed us to test the reliability of each calibration and see how the age of each node was affected by various calibrations. The best model was chosen according to the molecular clock statistics as explained below.

Here are the details of the five calibration points used in this study:

Node 1: The calibration for the root of the tree corresponds to the first appearance of radiolarian fossils in the Phanerozoic, which is recognized to be in the early Cambrian, 542 Mya (23, 24). We therefore set a minimum (542 Mya) and maximum (800 Mya) bound with a uniform probability,  $U$  (542–800), to allow uncertainty about the origin of Radiolaria.

Node 2: This calibration is based on the first occurrence of fossils of Nassellaria in the Devonian, 316–459 Mya (25, 26). The prior was normally distributed with a mean of 370 and

a SD of 50:  $N$  (370, 50). The Nassellaria–Spumellaria clade was forced to form a monophyletic group as shown in recent multigene phylogenies (27, 28).

Node 3: The genus *Hexaccontium* and the family Spongodiscidae (represented by the taxa *Dictyocoryne* spp., *Stylodictya* sp., *Spongodiscus* spp., *Spongaster* sp., and *Euchitonia* sp.) appear in the fossil record in the Triassic (26). However, according to ref. 25, *Hexaccontium* would occur instead in the Jurassic (150–200 Mya) and another study (29) identifies the first members of the Spongodiscidae in the Campanian deposits around 80 Mya. In different molecular phylogenies (27), *Hexaccontium* and Spongodiscidae group together within a monophyletic clade. Thus, we decided to constrain the node of this clade with a calibration at 200 Mya and a broad SD of 50:  $N$  (200, 50), covering the Triassic and Jurassic due to the uncertainties mentioned above.

Node 4: Fossils of *Actinomma* sp. would first appear in the Triassic but with some taxonomic uncertainty (25) and were observed in the Cretaceous in many places worldwide (26). The family Actinomidae would have a reliable fossil in the Jurassic (175 Mya). The node corresponding to the divergence of *Actinomma* sp. was therefore set at 170 Mya:  $N$  (170, 30).

Node 5: This node corresponds to the first fossils of the genus *Cladococcus*, which would be in the Cenozoic era (Paleocene, 60 Mya) (25, 26). We used  $N$  (60, 20) as a prior for this calibration.

The Markov chains were run two times for 30 million generations and sampled every 1,000 generations. The two runs were combined with LogCombiner v1.6.1, and the first 6,000 trees were discarded as burn-in. MCMC chain convergence and stationarity were assessed using Tracer v1.5 by examining effective sample sizes (effective sample size values > 500) for all parameters, such as posterior, prior, likelihood, etc. Node ages and the 95% highest posterior density (HPD) interval for divergence times were calculated using TreeAnnotator v1.6.1 and visualized with FigTree v1.3.1 (Fig. S7).

For *Phaeocystis*, the divergence time analysis was carried out with four fossil-based calibrations from coccolithophores used in a previous study (30). The molecular dataset comprises the nuclear 18S and 28S rDNA and plastidial rbcL genes of *Phaeocystis* (from the clades defined in this study) and from other haptophytes: 78 taxa in total with 3,773 aligned characters. The three genes were considered into one single partition (30), the Pavlovales were set as the outgroup, and *Phaeocystis* was set as a monophyletic group.

We used four calibration points:

Node 1: First occurrence in the fossil record of heterococcoliths:  $N$  (220, 4).

Node 2: Divergence of *Umbilicosphaera* sp. and *Coccolithus* sp.:  $N$  (65, 2).

Node 3: First occurrence of *Helicosphaera* sp.:  $N$  (25, 1).

Node 4: Divergence of *Umbilicosphaera* sp. and *Calcidiscus* sp.:  $N$  (24, 2).

The Markov chains were run two times for 50 million generations and sampled every 1,000 generations. The two runs were combined with LogCombiner v1.6.1, and the first 10,000 trees were discarded as burn-in. The corresponding molecular clock is shown in Fig. S8.

**Dimethylsulfoniopropionate and Dimethyl Sulfoxide Analyses and Calculations of Cell Content.** Aliquots of an exponentially growing *Phaeocystis cordata* culture were preserved in 12-mL gas-tight glass vials, with no headspace. The vials were immediately capped and crimped after adding two NaOH pellets (0.2 M final concentration, pH > 12). Samples with 0.22  $\mu\text{m}$  filtered seawater containing 50–200 acantharian cells and blanks containing only filtered seawater were processed and stored in the same way. Dimethylsulfoniopropionate (DMSP) was measured, within 2 mo, as the dimethylsulfide (DMS) evolved by alkaline hydrolysis, using

purge and trap gas chromatography coupled to flame photometric detection (GC-FPD). Aliquots of 10–20  $\mu\text{L}$ , withdrawn with a gas-tight syringe, were analyzed for the *P. cordata* culture, whereas those of 20–100  $\mu\text{L}$  were analyzed in the case of Acantharia samples. The aliquots were injected into a purge vial containing ca. 1–3 mL of milliQ water and were purged with He (40 mL/min). The stripped DMS was cryogenically trapped, revolatilized, injected, analyzed, and quantified as described elsewhere (31). Analytical replicates ( $n = 2\text{--}4$ ) of each sample had a relative analytical error  $<7\%$  (average 4%). In turn, the mean DMS + DMSP concentrations of triplicate samples of the *P. cordata* culture showed good agreement (experimental error  $<8\%$ ). Because *Phaeocystis* strains are able to cleave DMSP, the culture medium might contain DMS, which was not measured. Hence, the values reported here for the cultures are actually DMS + DMSP concentrations. DMS was assumed to represent around 10% of the DMS + DMSP pool, as previously reported for *Phaeocystis* cultures with cell densities in the same order of those analyzed here (32, 33). In the natural Acantharia samples, conversely, reported values correspond to particulate (cellular) DMSP, because total DMS + DMSP concentrations were corrected by subtraction of dissolved DMS + DMSP concentrations in filtered seawater.

Dimethyl sulfoxide (DMSO) was analyzed as DMS, using the cobalt-doped borohydride ( $\text{NaBH}_4$ ) reduction method (34). After having purged the DMS evolved from alkaline DMSP cleavage from the sample aliquots, a small piece (20–50 mg) of  $\text{NaBH}_4$  was added to the purge vial. For 2 min, the reducing agent was allowed to react in the capped vial connected to the cryogenic trap, so that the evolved  $\text{H}_2$  stripped the formed DMS into the trap. Then, the purge was initiated and held over 6 more minutes. Finally, trapped DMS was injected and analyzed by GC-FPD as described above. In the *P. cordata* culture, reported values correspond to total (particulate plus dissolved) DMSO, with dissolved DMSO concentrations potentially being of the same order as those of particulate DMSO (35). In the natural Acantharia samples, conversely,

reported values correspond to particulate (cellular) DMSO, because total DMSO concentrations were corrected by subtraction of dissolved DMSO concentrations in filtered seawater.

Measured total DMSP (DMSPt) and total DMSO (DMSOt) concentrations in the Acantharia and the *P. cordata* suspensions (pmol/mL) were converted into pmol/cell content by dividing by cell numbers in each sample. Putative intracellular DMSPt concentrations in cultured and symbiont *P. cordata* were estimated by considering that the spherical-equivalent diameter size of the cultured strain was 4.0  $\mu\text{m}$  and that of the symbiont cells (measured by confocal microscopy) was  $6.79 \pm 2.14 \mu\text{m}$ . Carbon content of *P. cordata* cells was estimated by the equation  $C$  (pg/cell) =  $0.216 V^{0.939}$  (36). Contribution of DMSP to total cell carbon was calculated considering that 1 pmol DMSP = 5 pmol C.

**Fluorescence Microscopy.** Microscopy was conducted using a Leica SP5II confocal laser scanning microscope and an HCX PL APO lambda blue  $63 \times 1.40$  OIL UV objective or an HCX PL APO CS  $20 \times 0.70$  IMM UV objective, according to specimen size. All pictures but swimmers are from live specimens freshly collected from the environment prior to confocal scanning laser microscopy imaging (Leica Microsystem SP5II). Swimmers were fixed with 1% glutaraldehyde prior to imaging. Nuclei and membrane structures were stained for 30 min with 10  $\mu\text{M}$  Hoechst 33342 (Invitrogen) and 17  $\mu\text{M}$  DiOC6 (Invitrogen), respectively. Two sequence steps were designed to collect the first DiOC6 signal (ex488 nm/em500–520 nm) simultaneously with the chlorophyll signal (ex633 nm/em670–700 nm) and then the Hoechst signal (ex405 nm/em420–470 nm). Red, green, and blue channels are respectively dedicated to chlorophyll, DiOC6/membranes, and Hoechst33342/nuclei fluorescence. Image handling was performed using Fiji (ImageJ: <http://pacific.mpi-cbg.de/>). All pictures from Fig. 2 are maximum projections from suitable z-stacks, but the Acantharia close-up illustrates a single optical slice.

- Decelle J, Suzuki N, Mahé F, de Vargas C, Not F (2012) Molecular phylogeny and morphological evolution of the Acantharia (Radiolaria). *Protist* 163(3):435–450.
- Katoh K, Toh H (2008) Recent developments in the MAFFT multiple sequence alignment program. *Brief Bioinform* 9(4):286–298.
- Stamatakis A, Hoover P, Rougemont J (2008) A rapid bootstrap algorithm for the RAxML Web-Servers. *Syst Biol* 57(5):758–771.
- Medlin LK, Elwood HJ, Stickel S, Sogin ML (1988) The characterization of enzymatically amplified eukaryotic 16S-like rRNA-coding regions. *Gene* 71(2):491–499.
- Ando H, et al. (2009) Intraspecific variations in the ITS region of recent radiolarians. *Earth Evol Sci* 3:37–44.
- Fuller N, et al. (2006) Analysis of photosynthetic picoeukaryote diversity at open ocean sites in the Arabian Sea using a PCR biased towards marine algal plastids. *Aquat Microb Ecol* 43:79–93.
- Lepère C, et al. (2011) Whole-genome amplification (WGA) of marine photosynthetic eukaryote populations. *FEMS Microbiol Ecol* 76(3):513–523.
- Coolen MJL, et al. (2004) Combined DNA and lipid analyses of sediments reveal changes in Holocene haptophyte and diatom populations in an Antarctic lake. *Earth Planet Sci Lett* 223:225–239.
- Simon N, et al. (2000) Oligonucleotide probes for the identification of three algal groups by dot blot and fluorescent whole-cell hybridization. *J Eukaryot Microbiol* 47(1):76–84.
- Liu H, et al. (2009) Extreme diversity in noncalcifying haptophytes explains a major pigment paradox in open oceans. *Proc Natl Acad Sci USA* 106(31):12803–12808.
- Fujiwara S, et al. (1994) Molecular phylogenetic analysis of *rbcl* in the Prymnesiophyta. *J Phycol* 30:863–871.
- Castresana J (2000) Selection of conserved blocks from multiple alignments for their use in phylogenetic analysis. *Mol Biol Evol* 17(4):540–552.
- Posada D (2008) jModelTest: Phylogenetic model averaging. *Mol Biol Evol* 25(7):1253–1256.
- Drummond AJ, Rambaut A (2007) BEAST: Bayesian evolutionary analysis by sampling trees. *BMC Evol Biol* 7:214.
- Ersts PJ (2012) Geographic Distance Matrix Generator (ver 1.2.3) (American Museum of Natural History, Center for Biodiversity and Conservation, USA). Available at [http://biodiversityinformatics.amnh.org/open\\_source/gdmg](http://biodiversityinformatics.amnh.org/open_source/gdmg). Accessed September 2, 2011.
- Tamura K, et al. (2011) MEGA5: Molecular evolutionary genetics analysis using maximum likelihood, evolutionary distance, and maximum parsimony methods. *Mol Biol Evol* 28(10):2731–2739.
- Page RDM (2003) *Tangled Trees: Phylogeny, Cospeciation, and Coevolution* (Univ of Chicago Press, Chicago).
- Light JE, Hafner MS (2008) Codivergence in heteromyid rodents (Rodentia: heteromyidae) and their sucking lice of the genus *Fahrenholzia* (Phthiraptera: anoplura). *Syst Biol* 57(3):449–465.
- Desdevises Y (2007) Cophylogeny: Insights from fish-parasite systems. *Parassitologia* 49(3):125–128.
- Conow C, Fielder D, Ovadia Y, Libeskind-Hadas R (2010) Jane: A new tool for the cophylogeny reconstruction problem. *Algorithms Mol Biol* 5:16.
- Legendre P, Desdevises Y, Bazin E (2002) A statistical test for host-parasite coevolution. *Syst Biol* 51(2):217–234.
- Meier-Kolthoff JP, Auch AF, Huson DH, Göker M (2007) COPYSAT: Cophylogenetic analysis tool. *Bioinformatics* 23(7):898–900.
- Anderson OR, ed (1983) *Radiolaria* (Springer, New York).
- Braun A, Chen J, Waloszek D, Maas A (2007) First early Cambrian Radiolaria. *Geol Soc Lond Spec Publ* 286:143–149.
- De Wever P, Dumitrica P, Caulet JP, Nigrini C, Caridroit M, eds (2001) *Radiolarians in the Sedimentary Record* (Gordon and Breach Scientific, Amsterdam).
- PaleoDB Paleobiology Database (2011) Available at <http://paleodb.org/>. Accessed August 14, 2011.
- Krabberød AK, et al. (2011) Radiolaria divided into Polycystina and Spasmaria in combined 18S and 28S rDNA phylogeny. *PLoS ONE* 6(8):e23256.
- Ishitani Y, et al. (2011) Multigene phylogenetic analyses including diverse radiolarian species support the “Retaria” hypothesis – The sister relationship of Radiolaria and Foraminifera. *Mar Micropaleontol* 81:32–42.
- O’Dogherty L, et al. (2009) Catalogue of Mesozoic radiolarian genera. *Geodiversitas* 31(2):213–270.
- Liu H, Aris-Brosou S, Probert I, de Vargas C (2010) A time line of the environmental genetics of the haptophytes. *Mol Biol Evol* 27(1):161–176.
- Saló V, Simó R, Calbet A (2010) Revisiting the dilution technique to quantify the role of microzooplankton in DMS(P) cycling: Laboratory and field tests. *J Plankton Res* 32:1255–1267.
- Stefels J, Van Boeckel WHM (1993) Production of DMS from dissolved DMSP in axenic cultures of the marine phytoplankton species *Phaeocystis* sp. *Mar Ecol Prog Ser* 97:11–18.
- Matrai PA, et al. (1995) Light-dependent production of DMS and carbon incorporation by polar strains of *Phaeocystis* spp. *Mar Biol* 124:157–167.
- Simó R, Vila-Costa M (2006) Ubiquity of algal dimethylsulfoxide in the surface ocean: Geographic and temporal distribution patterns. *Mar Chem* 100:136–146.
- Hatton AD, Wilson ST (2007) Particulate dimethylsulphoxide and dimethylsulphoniopropionate in phytoplankton cultures and Scottish coastal waters. *Aquat Sci* 69:330–340.
- Menden-Deuer S, Lessard EJ (2000) Carbon to volume relationships for dinoflagellates, diatoms, and other protist plankton. *Limnol Oceanogr* 45:569–579.



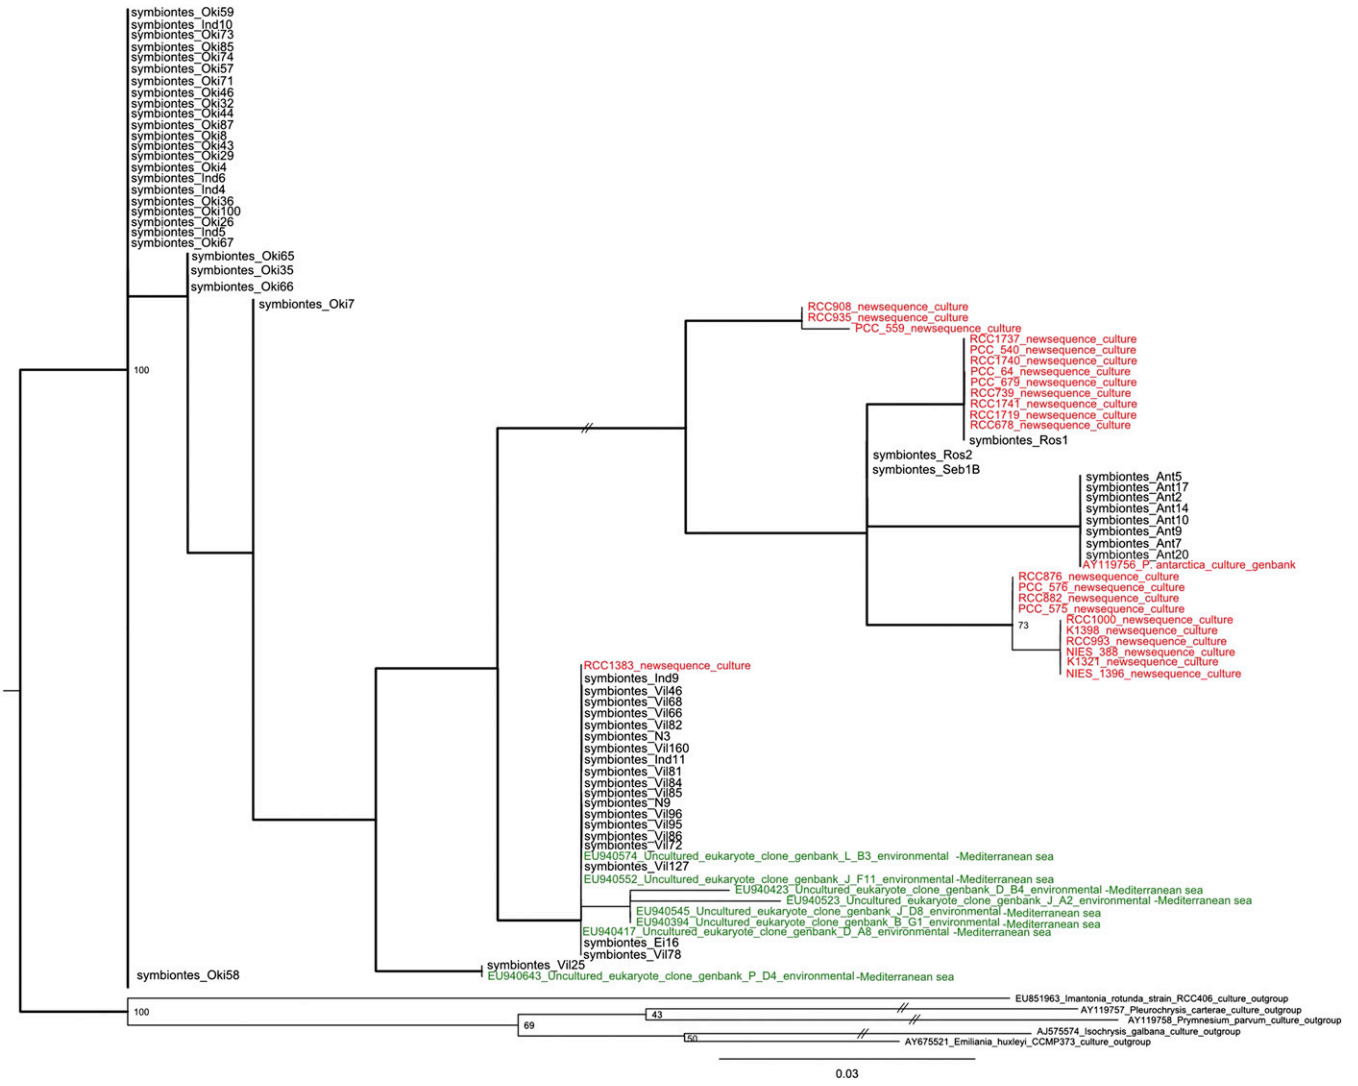

Fig. S1. Maximum-likelihood phylogeny inferred from RAXML with the psbA gene. Black, symbiont sequences; red, culture sequences; green, environmental sequences. Only RAXML bootstrap values  $\geq 70\%$  are shown.





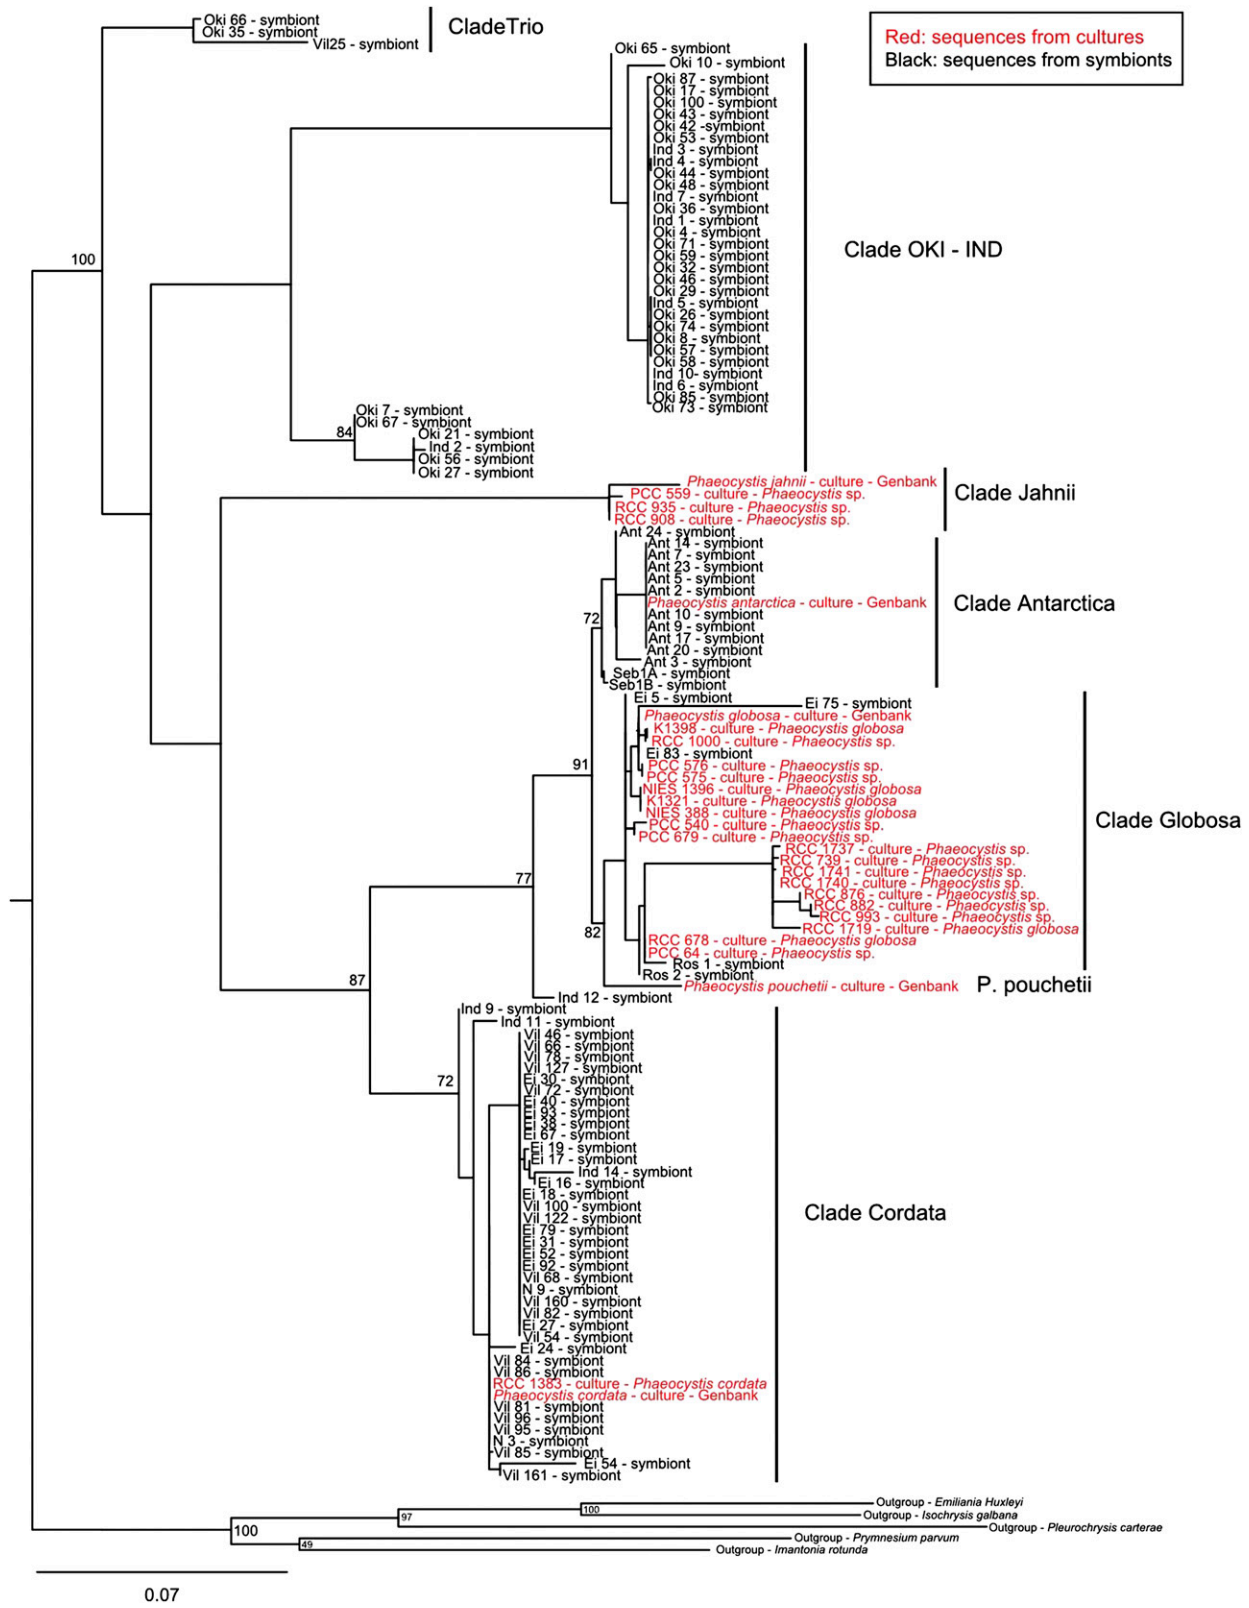

Fig. 54. Maximum-likelihood phylogeny inferred from RAxML with the concatenated 18S and 28S rDNA, rbcL, and psbA genes. Only RAxML bootstrap values  $\geq 70\%$  are shown.

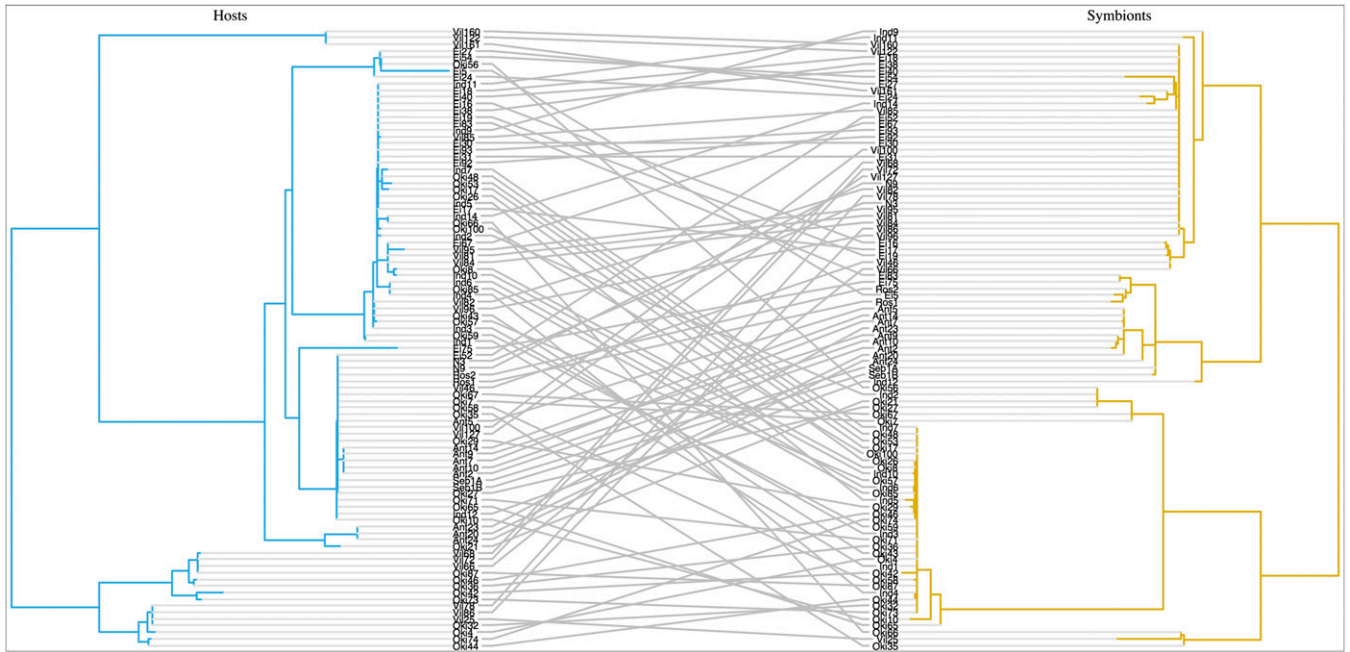

**Fig. 55.** Pattern of host-symbiont associations, based on the ML phylogenetic trees for 94 acantharian taxa (host) and their symbiotic microalgae (*Phaeocystis* sp.).

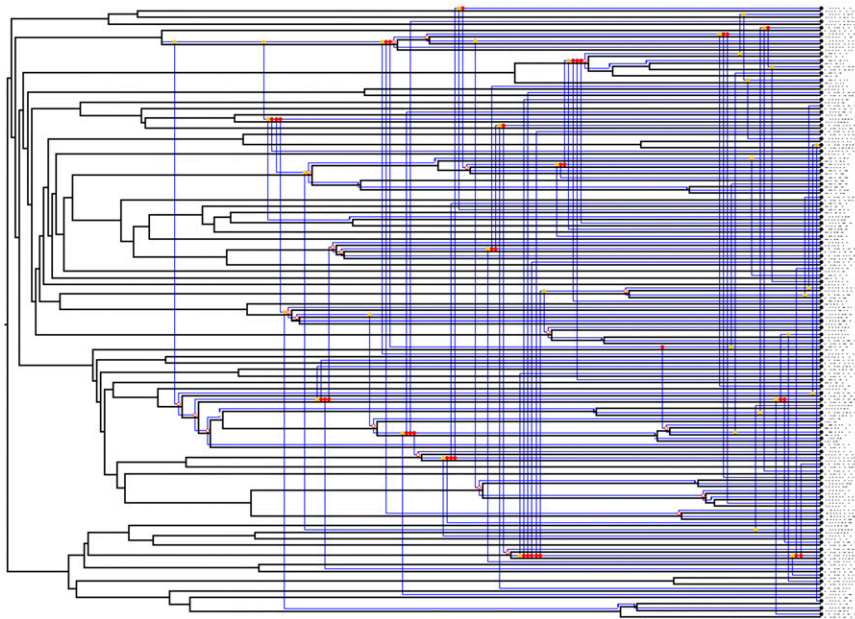

**Fig. 56.** Optimal and significant tree reconciliation produced by the software Jane. The symbiont tree is mapped onto the host tree by mixing cospeciations (white circles), duplications (colored circles), host switches (arrows), and sorting events (dashed lines).



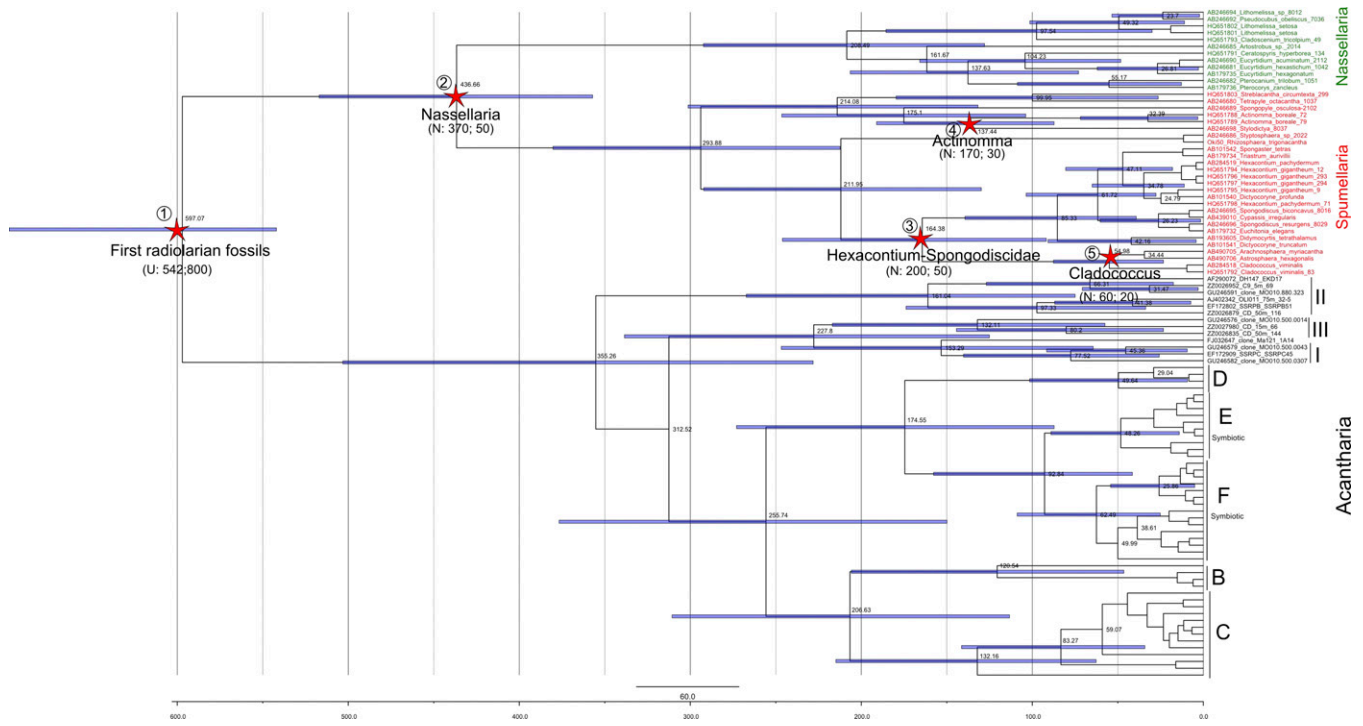

Fig. S7. Time-calibrated tree of the radiolarian groups, Acantharia, Spumellaria, and Nassellaria, using five fossil-based calibration points (red stars), based on nuclear 18S rDNA. Node divergences were estimated with a Bayesian relaxed clock model and the GTR + I + G model, implemented in the software package BEAST. Blue bars indicate the 95% highest posterior density (HPD) intervals of the posterior probability distribution of node ages.

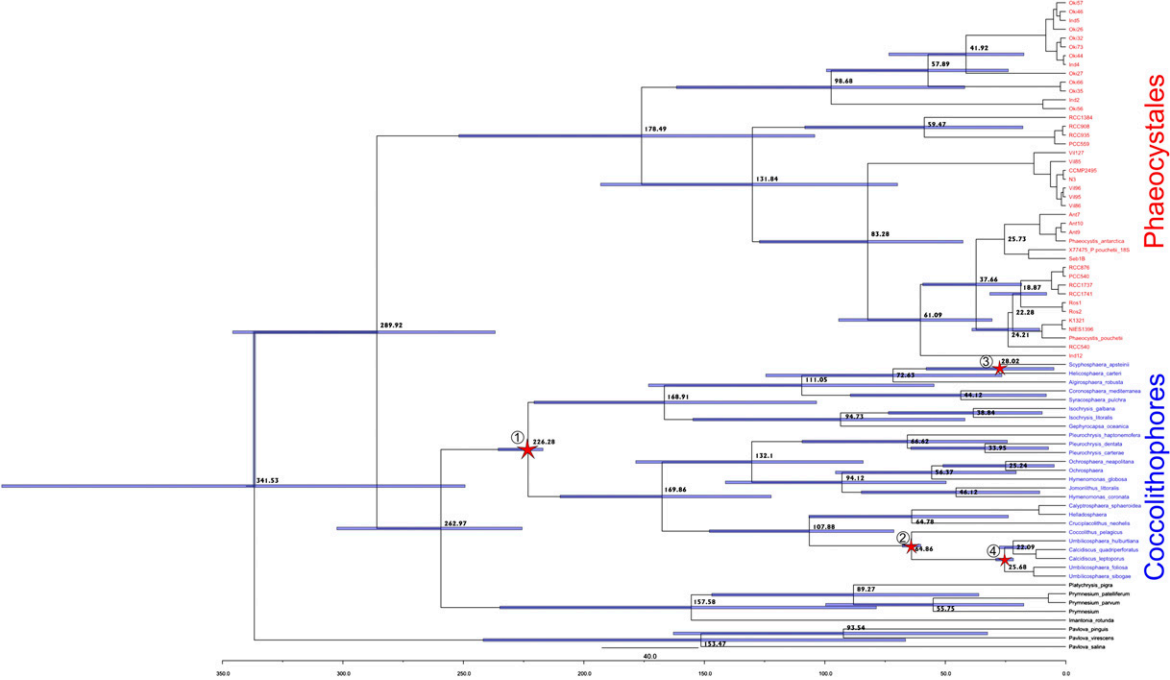

Fig. S8. Time-calibrated tree of haptophytes, including the Phaeocystales, using four fossil-based calibration points from coccolithophores (red stars), based on nuclear 18S and 28S rDNA and plastidial rbcL gene. Node divergences were estimated with a Bayesian relaxed clock model and the GTR + I + G model, implemented in the software package BEAST. Blue bars indicate the 95% highest posterior density (HPD) intervals of the posterior probability distribution of node ages.

**Table S1. Geographic origins of the Acantharia (host) sampled in this study that live with symbiotic *Phaeocystis***

| Oceanic region     | Sampling sites  | Latitude       | Longitude       |
|--------------------|-----------------|----------------|-----------------|
| Mediterranean sea  | Naples          | 40°44'52.75''N | 14°14'50.53''E  |
|                    | Villefranche    | 43°40'55.20''N | 7°18'44.76''E   |
| Red sea            | Eilat           | 29°30'18.15''N | 34°57'25.01''E  |
| East Pacific Ocean | Okinawa         | 26°13'6.12''N  | 127°16'26.69''E |
| Indian Ocean       | Indian st39     | 18°41'60.00''N | 66°17'60.00''E  |
|                    | Indian st41     | 14°35'60.00''N | 69°54'0.00''E   |
| English Channel    | Roscoff         | 48°45'5.49''N  | 3°57'18.58''W   |
| Antarctic          | Antarctica st84 | 60°12'0.85''S  | 60°30'2.10''W   |
|                    | Antarctica st85 | 62°0'13.40''S  | 49°16'53.36''W  |
|                    | Antarctica st86 | 64°21'0.569''S | 53°00'0.367''W  |
|                    | Antarctica st88 | 63°24'0.598''S | 56°47'0.621''W  |
| South Atlantic     | Seb st80        | 40°39'0.245''S | 52°12'0.477''W  |
